# Supplementary material for: Tricuspid regurgitation in the context of severe left-sided valvular disease: Patients characteristics and outcome
Source: PubMed Central journal article supplement (PMC11325386; doi:10.1016/j.heliyon.2024.e34874), 2024-07-19
Supplement: mmc1.pdf [file mmc1.pdf]

**Supplementary Table 1.** Baseline characteristics of the original population.

|                                     | <b>Original population<br/>(n=1183)</b> |
|-------------------------------------|-----------------------------------------|
| Age (years)                         | 73± 13                                  |
| Female gender, n (%)                | 581 (49%)                               |
| Weight (kg)                         | 70± 15                                  |
| BMI (kg/m <sup>2</sup> )            | 25.6± 4.9                               |
| BSA (m <sup>2</sup> )               | 1.8± 0.2                                |
| Hypertension                        | 792 (67%)                               |
| Diabetes                            | 272 (23%)                               |
| Dyslipidemia                        | 495 (42%)                               |
| Smoking history (former or current) | 136 (11%)                               |
| History of CAD                      | 318 (27%)                               |
| Previous CABG                       | 40 (3%)                                 |
| Cardiomyopathy                      | 65 (5%)                                 |
| CIED                                | 151 (13%)                               |
| Atrial fibrillation                 | 533 (45%)                               |
| COPD                                | 88 (7%)                                 |
| History of cancer (past or active)  | 177 (15%)                               |
| CKD                                 | 734 (62%)                               |
| Charlson Comorbidity Index          | 4.2± 2.2                                |
| NYHA class                          |                                         |
| I                                   | 343 (29%)                               |
| II                                  | 438 (37%)                               |
| III/IV                              | 402 (34%)                               |
| Hb (g/dl)                           | 11.1± 2                                 |
| eGFR (CKD-EPI, ml/min/mq)           | 53± 27                                  |
| LVEF (%)                            | 52± 13                                  |
| SVi (ml/m <sup>2</sup> )            | 33± 11                                  |
| PASP (mmHg)                         | 50± 16                                  |
| RVEDD (mm)                          | 42± 8                                   |
| TAPSE (mm)                          | 18± 5                                   |
| VC (mm)                             | 7± 3                                    |
| RAES area (cm <sup>2</sup> )        | 26± 8                                   |
| RAP (mmhg)                          | 10± 6                                   |

Values are mean  $\pm$  SD or n (%), unless otherwise specified. Abbreviations: BMI, Body Mass Index, is the weight in kilograms divided by the square of the height in meters; BSA, Body Surface Area; CAD, Coronary Artery Disease; CABG, Coronary Artery Bypass Graft; CIED, Cardiac Implantable Electronic Device; COPD, Chronic Obstructive Pulmonary Disease; CKD, Chronic Kidney Disease, defined as eGFR <60 mL/min; eGFR, estimated Glomerular Filtration Rate; EPI, Epidemiology Collaboration; LVEF, Left Ventricular Ejection Fraction; SVi, Stroke Volume Indexed; PASP, Pulmonary Artery Systolic Pressure; RVEDD, Right Ventricle End-Diastolic Diameter; TAPSE, Tricuspid Annular Plane Systolic Excursion; VC, Vena Contracta; RAES, Right Atrium End-Systolic; RAP, Right Atrium Pressure.
