# Supplementary material for: Tricuspid regurgitation in the context of severe left-sided valvular disease: Patients characteristics and outcome
Source: PubMed Central journal article supplement (PMC11325386; doi:10.1016/j.heliyon.2024.e34874), 2024-07-19
Supplement: mmc2.pdf [file mmc2.pdf]

**Supplementary Table 2.** Propensity score matching for age was used to create matched cohorts in the different groups of VD with an absolute standardized differences <10%

|                             | <b>Overall population</b> | <b>Isolated TR</b> | <b>TR + severe MR</b> | <b>TR + severe AS</b> | <b>TR+ severe AR</b> | <b>Absolute standardized difference</b> |
|-----------------------------|---------------------------|--------------------|-----------------------|-----------------------|----------------------|-----------------------------------------|
| <b>Number of patients</b>   | 1183                      | 423 (36%)          | 599 (51%)             | 132 (11%)             | 29 (2%)              |                                         |
| <b>Mean Age (years)</b>     |                           | 82                 | 67                    | 62                    | 74                   | 25%                                     |
| <b>Propensity age exact</b> |                           |                    |                       |                       |                      |                                         |
| <b>Number of patients</b>   | 975                       | 356 (37%)          | 466 (48%)             | 131 (13%)             | 22 (2%)              |                                         |
| <b>Mean Age (years)</b>     |                           | 81                 | 73                    | 76                    | 78                   | 9%                                      |
