# Supplementary material for: Tricuspid regurgitation in the context of severe left-sided valvular disease: Patients characteristics and outcome
Source: PubMed Central journal article supplement (PMC11325386; doi:10.1016/j.heliyon.2024.e34874), 2024-07-19
Supplement: mmc3.pdf [file mmc3.pdf]

**Supplementary Table 3.** Differences in TR severity prevalence in the overall population and of patients according to valvular heart disease

|                    | Overall population (n=975) | Isolated TR (n= 356, 37%) | Severe MR+TR (n= 466, 48%) | Severe AS+TR (n=131, 13%) | Severe AR+TR (n= 22, 2%) | p-value for Pairwise Comparison Analysis |                             |                             |                              |                              |                              |
|--------------------|----------------------------|---------------------------|----------------------------|---------------------------|--------------------------|------------------------------------------|-----------------------------|-----------------------------|------------------------------|------------------------------|------------------------------|
|                    |                            |                           |                            |                           |                          | Isolated TR vs Severe MR+TR              | Isolated TR vs Severe AS+TR | Isolated TR vs Severe AR+TR | Severe MR+TR vs Severe AS+TR | Severe MR+TR vs Severe AR+TR | Severe AS+TR vs Severe AR+TR |
| <b>Moderate TR</b> | 502 (52%)                  | 250 (70%)                 | 127 (27%)                  | 105 (80%)                 | 20 (91%)                 |                                          |                             |                             |                              |                              |                              |
| <b>Severe TR</b>   | 473 (48%)                  | 106 (30%)                 | 339 (73%)                  | 26 (20%)                  | 2 (9%)                   | <b>&lt;0.001</b>                         | <b>0.038</b>                | 0.066                       | <b>&lt;0.001</b>             | <b>&lt;0.001</b>             | 0.363                        |
