# Supplementary material for: Tricuspid regurgitation in the context of severe left-sided valvular disease: Patients characteristics and outcome
Source: PubMed Central journal article supplement (PMC11325386; doi:10.1016/j.heliyon.2024.e34874), 2024-07-19
Supplement: mmc4.pdf [file mmc4.pdf]

**Supplementary Table 4.** Univariate and multivariate analysis of factors associated with severe TR in patients with concomitant left-sided VD.

| Parameter               | Univariate       |              | Multivariate     |              |
|-------------------------|------------------|--------------|------------------|--------------|
|                         | OR (95% CI)      | p value      | OR (95% CI)      | p value      |
| Age                     | 1.01 (0.97-1.03) | 0.159        |                  |              |
| Gender (female vs male) | 0.74 (0.53-1.04) | 0.079        |                  |              |
| History of CAD          | 1.32 (0.89-1.97) | 0.180        |                  |              |
| AF                      | 3.26 (1.46-7.27) | <b>0.004</b> | 3.02 (1.38-7.04) | <b>0.006</b> |
| COPD                    | 1.30 (0.80-1.99) | 0.232        |                  |              |
| LVEF (%)                | 1.03 (1.01-1.04) | <b>0.002</b> | 1.01 (0.99-1.03) | 0.251        |
| PASP (mmHg)             | 1.01 (1.00-1.03) | <b>0.021</b> | 1.01 (0.98-1.04) | 0.280        |
