# Supplementary material for: Tricuspid regurgitation in the context of severe left-sided valvular disease: Patients characteristics and outcome
Source: PubMed Central journal article supplement (PMC11325386; doi:10.1016/j.heliyon.2024.e34874), 2024-07-19
Supplement: mmc5.pdf [file mmc5.pdf]

**Supplementary Table 5.** Univariate and multivariable hazard ratio of severe TR for the outcomes.

|                              |           | <b>All-cause death</b> |                | <b>HF hospitalization + valvular intervention</b> |                |
|------------------------------|-----------|------------------------|----------------|---------------------------------------------------|----------------|
|                              |           | <b>HR (95% CI)</b>     | <b>p-value</b> | <b>HR (95% CI)</b>                                | <b>p-value</b> |
| <b>Univariate</b>            | Severe TR | 1.18 (0.82-1.71)       | 0.364          | 2.36 (1.27-3.52)                                  | <b>0.008</b>   |
| <b>Multivariate analysis</b> | Severe TR | NA                     |                | 1.12 (0.78-1.58)                                  | 0.447          |

Multivariate analysis– Adjusted for Age, NYHA class, Charlson index, LVEF, PASP
