# Supplementary material for: Tricuspid regurgitation in the context of severe left-sided valvular disease: Patients characteristics and outcome
Source: PubMed Central journal article supplement (PMC11325386; doi:10.1016/j.heliyon.2024.e34874), 2024-07-19
Supplement: mmc6.pdf [file mmc6.pdf]

**Supplementary Table 6.** Baseline differences between patients divided according to therapeutical management.

|                               | <b>Valve intervention<br/>(n=176, 18%)</b> | <b>Medical treatment<br/>(n= 799, 82%)</b> | <b>p-value</b>   |
|-------------------------------|--------------------------------------------|--------------------------------------------|------------------|
| Age (years)                   | 74±9                                       | 78±9                                       | <b>&lt;0.001</b> |
| Charlson Comorbidity Index    | 3.7±1.4                                    | 4.5±1.7                                    | <b>&lt;0.001</b> |
| eGFR (ml/min/mq)              | 53±21                                      | 47±25                                      | <b>0.006</b>     |
| PASP (mmHg)                   | 50±15                                      | 52±16                                      | 0.762            |
| LVEF (%)                      | 53±14                                      | 51±13                                      | 0.351            |
| Stroke Volume Indexed (ml/m2) | 37±11                                      | 33±11                                      | <b>0.023</b>     |

Values are mean ± SD or n (%), unless otherwise specified. See previous tables for abbreviations.
